# Supplementary material for: High-performance near-infrared Schottky-photodetector based graphene/In2S3 van der Waals heterostructures
Source: Royal Society of Chemistry journal article supplement (doi:10.1039/d0ra02033h), 2020-01-01

## Supporting Information

### High-performance Near-infrared Schottky-photodetectors Based Graphene/ $\text{In}_2\text{S}_3$ Van der Waals Heterostructures

Long Chen, Zhenghan Li, Chaoyi Yan\*

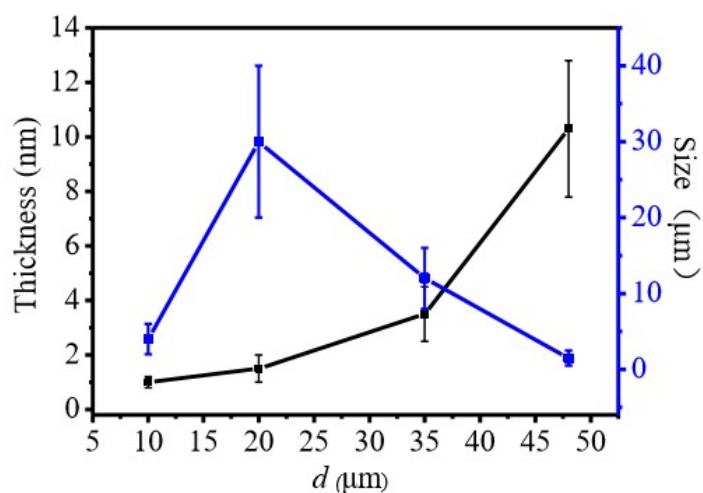

Figure S1 The confined space ( $d$ ) dependence of  $\beta\text{-In}_2\text{S}_3$  sheets thickness (black bar) and size (blue bar).

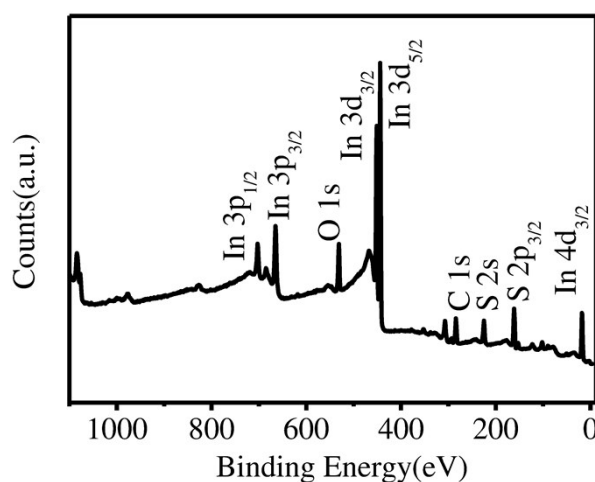

Figure S2 XPS spectrum of the as-grown  $\beta\text{-In}_2\text{S}_3$  nanosheets.

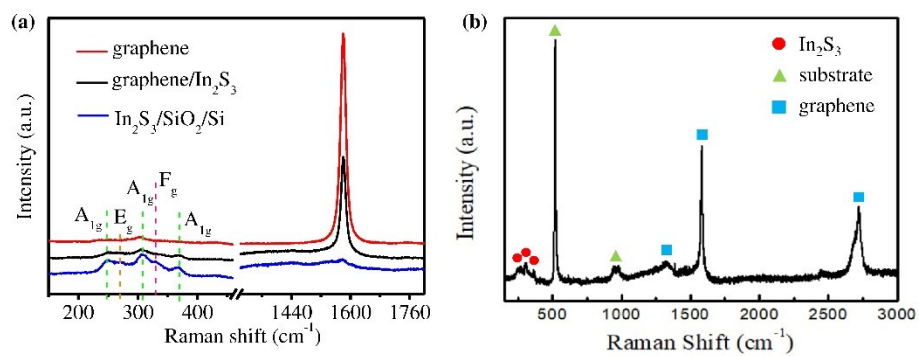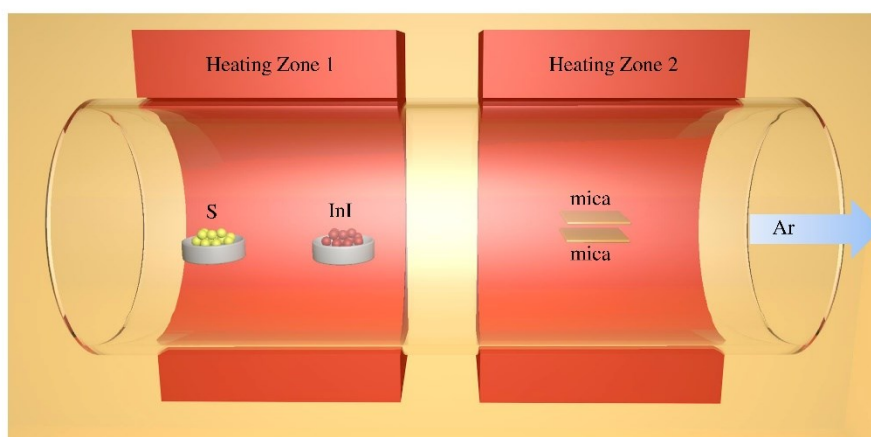

Supplement: d0ra02033h1.pdf [file d0ra02033h1.pdf]
